# Supplementary material for: Li3Cr(MoO4)3: a NASICON-type high specific capacity cathode material for lithium ion batteries
Source: Royal Society of Chemistry journal article supplement (doi:10.1039/c8ta07782g), 2018-01-01

## Supporting Information

### **Li<sub>3</sub>Cr(MoO<sub>4</sub>)<sub>3</sub>: A NASICON-type High Specific Capacity Cathode Material for Lithium Ion Batteries†**

Kai Feng,<sup>a</sup> Fuxiang Wang,<sup>a</sup> Hongzhang Zhang,<sup>b, c,\*</sup> Xianfeng Li,<sup>b, c,\*</sup> and  
Huamin Zhang<sup>b,c</sup>

*<sup>a</sup>Shandong Collaborative Innovation Center of Light Hydrocarbon Transformation and  
Utilization, College of Chemistry & Engineering, Yantai University, Yantai, 264005, China*

*<sup>b</sup>Division of energy storage, Dalian National Laboratory for Clean Energy, Dalian Institute of  
Chemical Physics, Chinese Academy of Sciences, Zhongshan Road 457, Dalian, 116023, China.*

*<sup>c</sup>Collaborative Innovation Center of Chemistry for Energy Materials (iChEM), Dalian 116023  
(P.R. China).*

The diffusion coefficient of Li ions ( $D$ ) is calculated according to the following Eq. (1) and Eq. (2)

$$D = R^2 T^2 / 2 A^2 n^4 F^4 C^2 \sigma^2 \quad (1)$$

$$Z' = R_s + R_{ct} + \sigma \omega^{-1/2} \quad (2)$$

where  $R$  is the gas constant,  $T$  is the absolute temperature,  $A$  is the surface area of the cathode,  $n$  is the number of electrons per molecule during oxidization,  $F$  is the Faraday constant,  $C$  is the concentration of lithium-ion,  $\sigma$  is the Warburg factor which has a relationship with  $Z'$  as shown in Eq. (2),  $R_s$  is the resistance between the electrolyte and electrode,  $R_{ct}$  is the charge transfer resistance, and  $\omega$  is angle frequency.

**Table S1** Kinetic parameters of  $\text{Li}_3\text{Cr}(\text{MoO}_4)_3@\text{C}$ .

| Sample                                          | $R_{ct}$ ( $\Omega$ ) | $\sigma$ | $D_{\text{Li}^+}$ ( $\text{cm}^2 \text{s}^{-1}$ )/EIS |
|-------------------------------------------------|-----------------------|----------|-------------------------------------------------------|
| $\text{Li}_3\text{Cr}(\text{MoO}_4)_3@\text{C}$ | 45                    | 53       | $3.0 \times 10^{-17}$                                 |

$R_{ct}$ : charge transfer resistance.  $\sigma$ : Warburg factor.  $D_{\text{Li}^+}$ : diffusion coefficient of  $\text{Li}^+$  ion.

**Figure S1** (a) Crystal Structure and (b) BVS-DMs of  $\text{Li}_3\text{Cr}(\text{MoO}_4)_3$ .

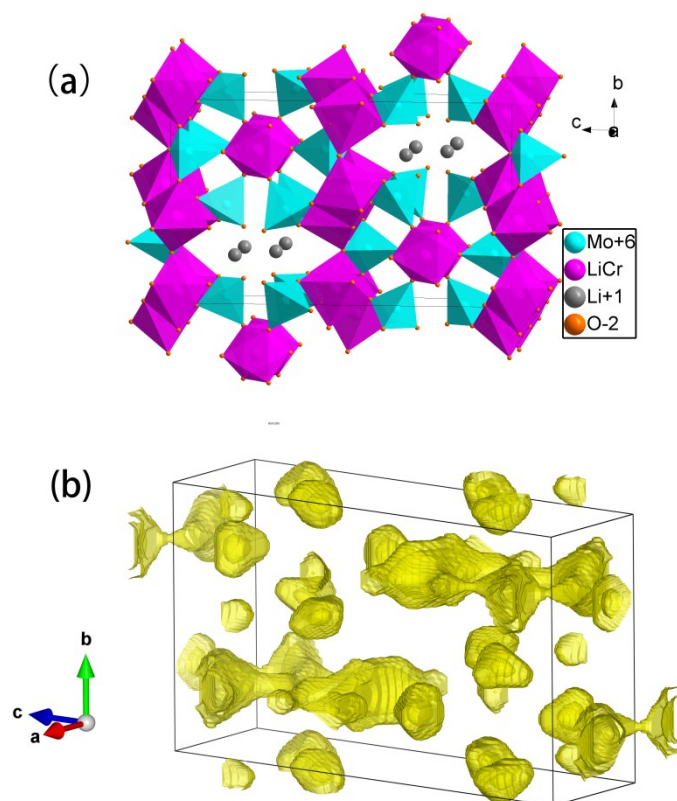

Supplement: c8ta07782g1.pdf [file c8ta07782g1.pdf]
